# Supplementary material for: Quantitative monitoring of circulating tumor DNA in patients with advanced pancreatic cancer undergoing chemotherapy
Source: PubMed Central journal article supplement — Cancer Sci. 2019 Dec 24;111(1):266–78. doi: 10.1111/cas.14245 (PMC6942439; doi:10.1111/cas.14245), 2019-12-24
Supplement: CAS-111-266-s003.pdf [file CAS-111-266-s003.pdf]

**Table S2**

Validation of the dPCR mutation analysis.

| Diluted sample                     | #1                                                                                | #2                                                                                | #3                                                                                | #4                                                                                | #5                                                                                 | #6                                                                                  | #7                                                                                  |
|------------------------------------|-----------------------------------------------------------------------------------|-----------------------------------------------------------------------------------|-----------------------------------------------------------------------------------|-----------------------------------------------------------------------------------|------------------------------------------------------------------------------------|-------------------------------------------------------------------------------------|-------------------------------------------------------------------------------------|
| DNA of MIA Pa Ca-2 (ng)            | 10                                                                                | 1                                                                                 | 0.1                                                                               | 0.01                                                                              | 0.001                                                                              | 0.0001                                                                              | 0                                                                                   |
| DNA of 293T (ng)                   | 0                                                                                 | 9                                                                                 | 9.9                                                                               | 9.99                                                                              | 9.999                                                                              | 9.9999                                                                              | 10                                                                                  |
| Estimated <i>KRAS</i> mutation (%) | 100                                                                               | 10                                                                                | 1                                                                                 | 0.1                                                                               | 0.01                                                                               | 0.001                                                                               | 0                                                                                   |
| Results of dPCR                    | 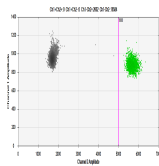 |  |  |  |  |  |  |
| Detected <i>KRAS</i> mutation (%)  | 100                                                                               | 9.73                                                                              | 0.98                                                                              | 0.09                                                                              | 0                                                                                  | 0                                                                                   | 0                                                                                   |

The *KRAS* mutations were detected by dPCR. The MIA PaCa-2 DNA sample was serially diluted by adding that of 293T.
